# Supplementary material for: The effect of rhenium on the conversion of glycerol to mono-alcohols over nickel catalysts under continuous flow conditions
Source: Royal Society of Chemistry journal article supplement (doi:10.1039/c9se00045c), 2019-01-01
Supplement: c9se00045c1.pdf [file c9se00045c1.pdf]

## Supplementary materials

### **The effect of rhenium in the conversion of glycerol to mono-alcohols over nickel catalysts under continuous flow conditions**

**Mzamo L. Shozi<sup>a</sup>, Venkata D.B.C. Dasireddy<sup>a</sup>, Sooboo Singh<sup>a</sup>, Alisa Govender<sup>b</sup>, Pheladi Mohlala<sup>b</sup> and Holger B. Friedrich<sup>a\*</sup>**

<sup>a</sup>School of Chemistry and Physics, University of KwaZulu-Natal, Durban, 4000, South Africa

<sup>b</sup>Sasol Technology R&T, 1 Klasie Havenga Street, Sasolburg, 1974, South Africa

---

\* To whom correspondence should be addressed: Email: [friedric@ukzn.ac.za](mailto:friedric@ukzn.ac.za)

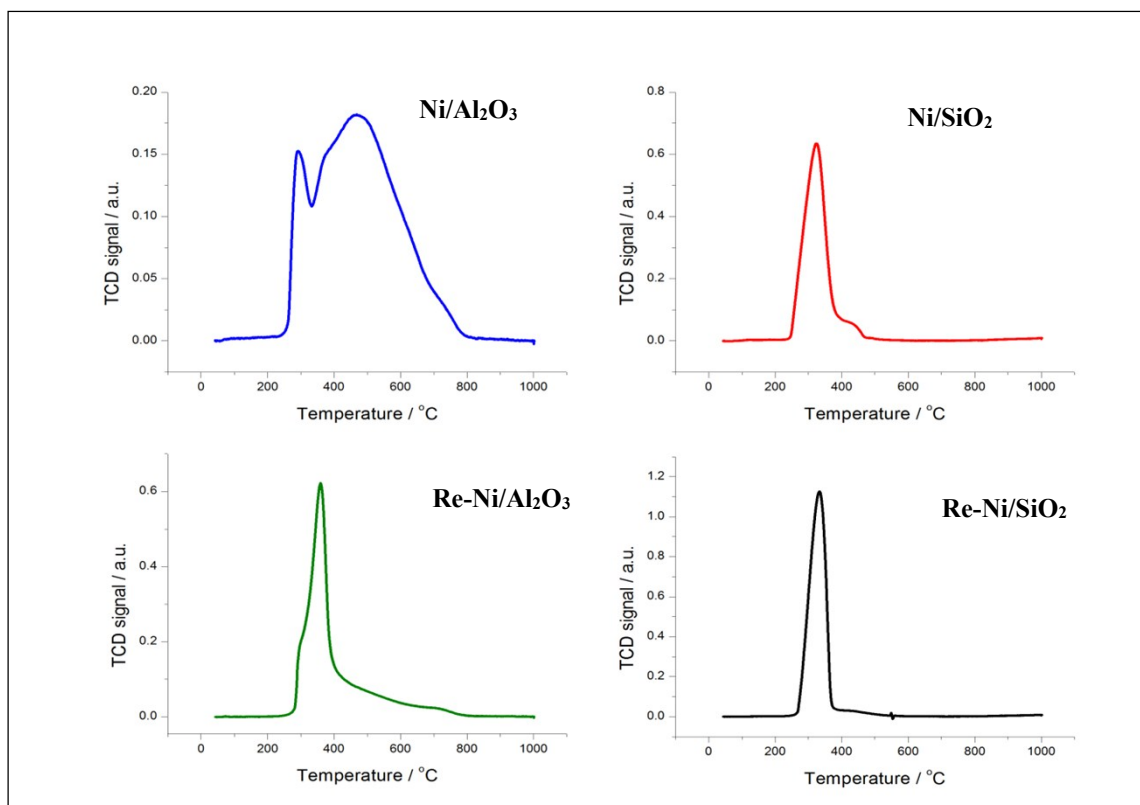

**Figure S1** TPR profiles of the Ni catalysts.

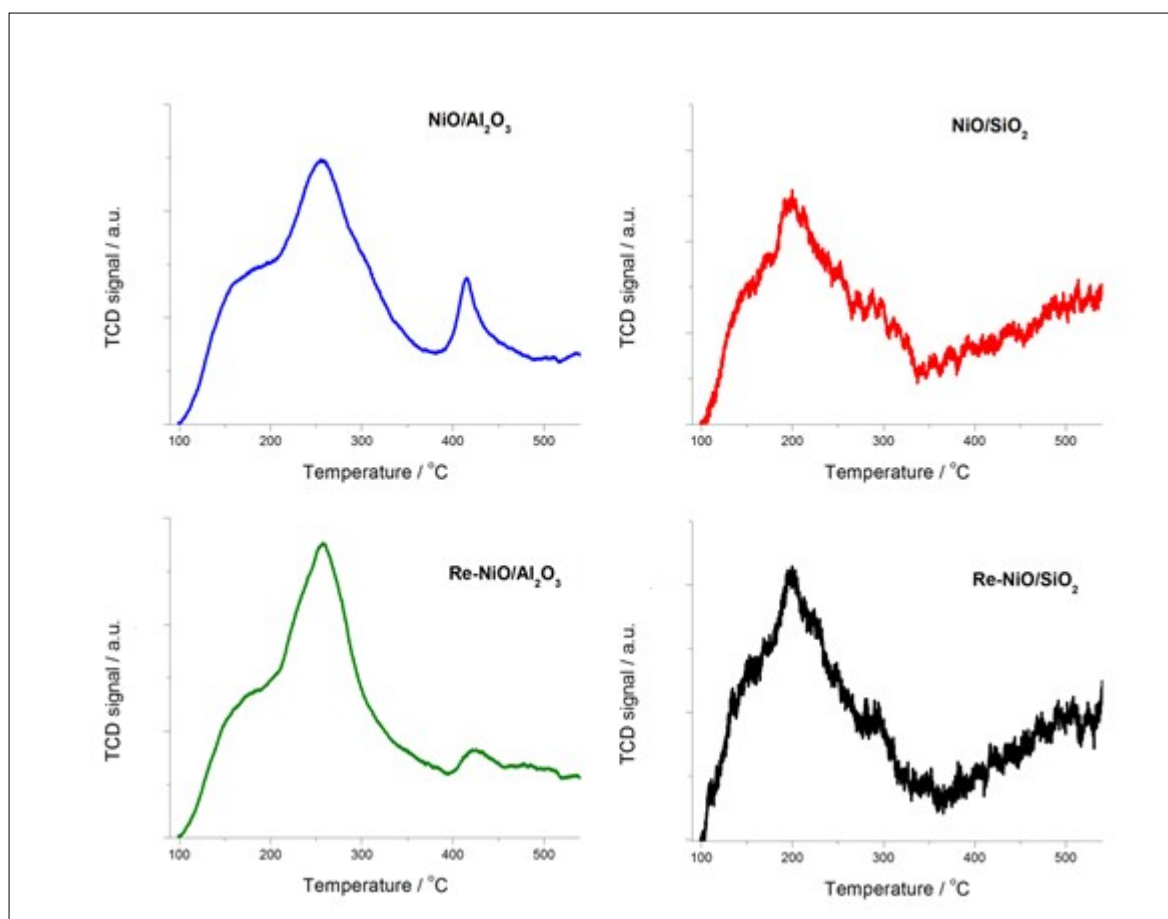

**Figure S2** TPD profiles of the Ni catalysts.

(a) Ni/Al<sub>2</sub>O<sub>3</sub>

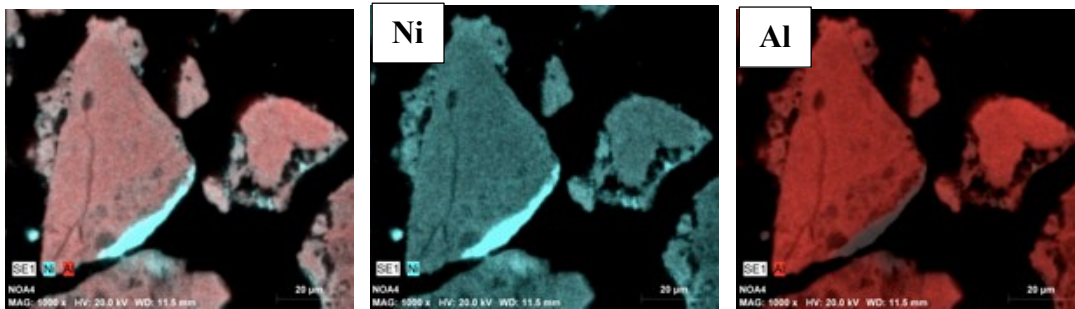

(b) Ni/SiO<sub>2</sub>

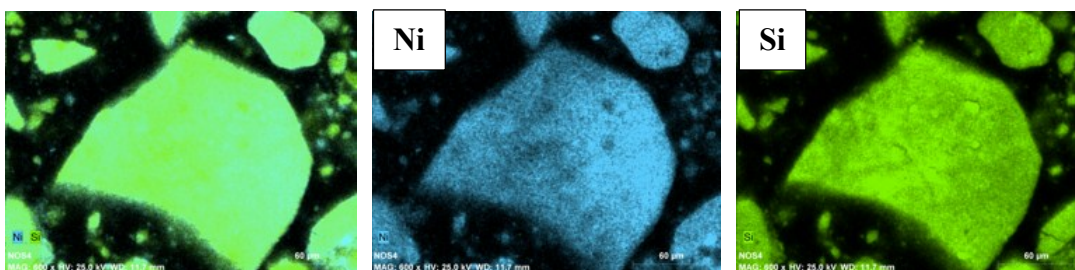

(c) Re-Ni/Al<sub>2</sub>O<sub>3</sub>

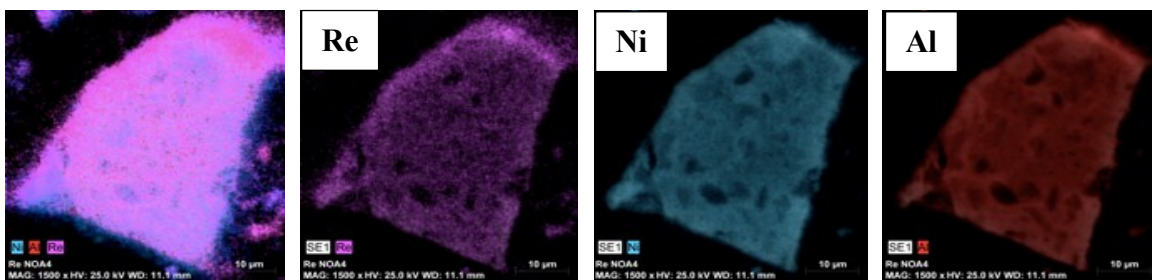

(d) Re-Ni/SiO<sub>2</sub>

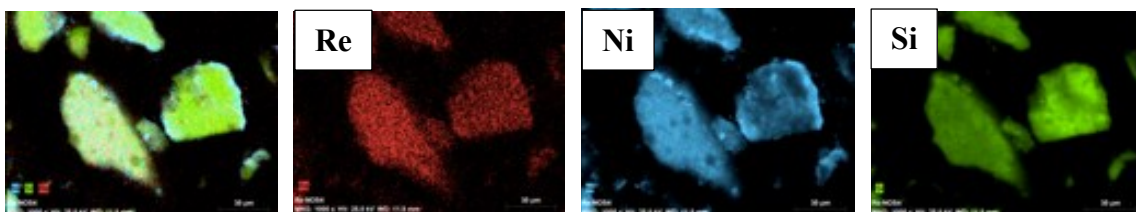

Figure S3 SEM-EDS images of (a) Ni/Al<sub>2</sub>O<sub>3</sub>, (b) Ni/SiO<sub>2</sub>, (c) Re-Ni/Al<sub>2</sub>O<sub>3</sub> and (d) Re-Ni/SiO<sub>2</sub>.

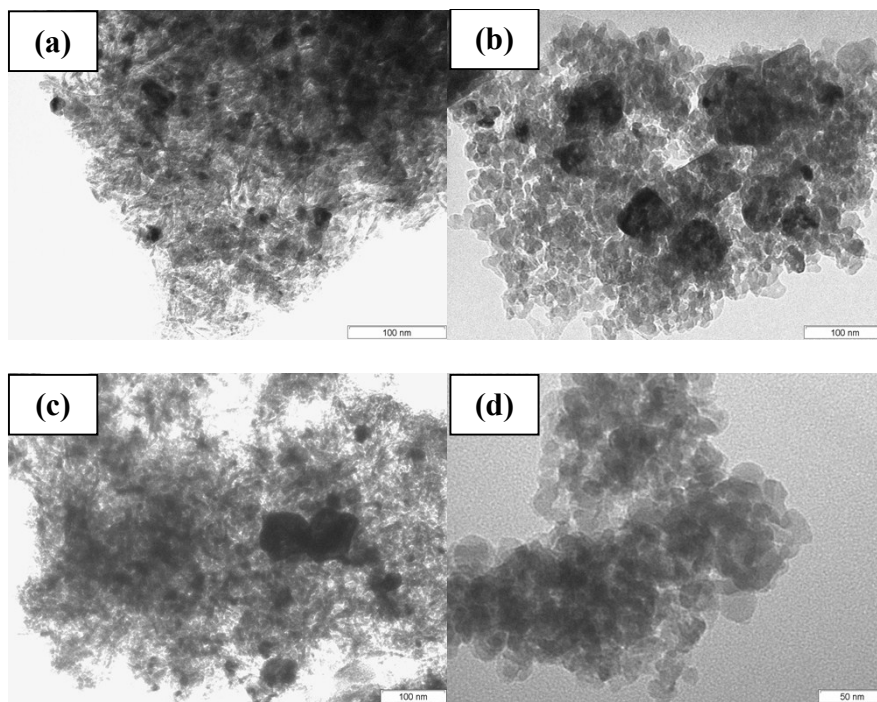

**Figure S4** TEM images of (a) Ni/Al<sub>2</sub>O<sub>3</sub>, (b) Ni/SiO<sub>2</sub>, (c) Re-Ni/Al<sub>2</sub>O<sub>3</sub> and (d) Re-Ni/SiO<sub>2</sub>.

## Hydrogen chemisorption

The crystallite size was calculated as follows:

$$d_p = \frac{F_g}{\rho \times MSA_m} \times \frac{m^3}{10^6 \text{ cm}^3} \times \frac{10^9 \text{ nm}}{m}$$

where:

$F_g$  = crystallite geometry factor

$\rho$  = specific gravity of the active metal, g/cm<sup>3</sup>

$MSA_m$  = active metal surface area per gram of metal, m<sup>2</sup>/g<sub>metal</sub>

**Table S1** Selectivity to products over Ni/Al<sub>2</sub>O<sub>3</sub>

|                           | Selectivity / mol% |        |        |        |
|---------------------------|--------------------|--------|--------|--------|
|                           | 250 °C             | 275 °C | 300 °C | 325 °C |
| <b>methanol</b>           | 2.3                | 4.4    | 9.7    | 15.6   |
| <b>ethanol</b>            | 9.3                | 13.7   | 19.2   | 24.4   |
| <b>2-propanol</b>         | 0.1                | 0.2    | 1.5    | 8.3    |
| <b>1-propanol</b>         | 0.4                | 0.9    | 3.4    | 10.2   |
| <b>ethylene glycol</b>    | 13.5               | 10.1   | 9.8    | 8.7    |
| <b>1,2-propanediol</b>    | 68.9               | 62.5   | 39.8   | 16.1   |
| <b>1,3-propanediol</b>    | 0.0                | 0.4    | 2.4    | 2.8    |
| <b>others<sup>a</sup></b> | 5.5                | 7.8    | 14.0   | 13.6   |

<sup>a</sup> Others = methane, ethane, propane, CO, CO<sub>2</sub>, acetol, condensation products

**Table S2** Selectivity to products over Ni/SiO<sub>2</sub>

|                           | Selectivity / mol% |        |        |        |
|---------------------------|--------------------|--------|--------|--------|
|                           | 250 °C             | 275 °C | 300 °C | 325 °C |
| <b>methanol</b>           | 7.2                | 9.3    | 19.9   | 25.6   |
| <b>ethanol</b>            | 7.1                | 13.8   | 18.8   | 19.9   |
| <b>2-propanol</b>         | 1.4                | 3.4    | 4.9    | 5.4    |
| <b>1-propanol</b>         | 2.1                | 5.0    | 7.3    | 9.7    |
| <b>ethylene glycol</b>    | 25.7               | 11.8   | 8.0    | 2.2    |
| <b>1,2-propanediol</b>    | 54.5               | 53.2   | 33.8   | 23.3   |
| <b>1,3-propanediol</b>    | 0.3                | 0.5    | 0.8    | 1.4    |
| <b>others<sup>a</sup></b> | 1.7                | 3.0    | 6.5    | 12.5   |

<sup>a</sup> Others = methane, ethane, propane, CO, CO<sub>2</sub>, acetol, condensation products

**Table S3** Selectivity to products over Re-Ni/Al<sub>2</sub>O<sub>3</sub>

|                           | Selectivity / mol% |        |        |        |
|---------------------------|--------------------|--------|--------|--------|
|                           | 250 °C             | 275 °C | 300 °C | 325 °C |
| <b>methanol</b>           | 2.5                | 3.2    | 8.0    | 13.6   |
| <b>ethanol</b>            | 7.7                | 10.8   | 14.5   | 17.7   |
| <b>2-propanol</b>         | 0.8                | 1.3    | 3.1    | 6.4    |
| <b>1-propanol</b>         | 2.3                | 4.9    | 12.7   | 29.4   |
| <b>ethylene glycol</b>    | 9.5                | 7.8    | 2.6    | 1.8    |
| <b>1,2-propanediol</b>    | 70.4               | 62.1   | 47.4   | 15.9   |
| <b>1,3-propanediol</b>    | 0.1                | 1.1    | 2.6    | 3.7    |
| <b>others<sup>a</sup></b> | 6.7                | 8.8    | 9.1    | 11.5   |

<sup>a</sup> Others = methane, ethane, propane, CO, CO<sub>2</sub>, acetol, condensation products

**Table S4** Selectivity to products over Re-Ni/SiO<sub>2</sub>

|                           | Selectivity / mol% |        |        |        |
|---------------------------|--------------------|--------|--------|--------|
|                           | 250 °C             | 275 °C | 300 °C | 325 °C |
| <b>methanol</b>           | 1.8                | 4.3    | 9.4    | 22.9   |
| <b>ethanol</b>            | 9.1                | 14.5   | 18.6   | 19.5   |
| <b>2-propanol</b>         | 0.3                | 1.1    | 3.6    | 4.4    |
| <b>1-propanol</b>         | 1.7                | 4.7    | 16.1   | 24.5   |
| <b>ethylene glycol</b>    | 10.0               | 5.3    | 2.3    | 1.2    |
| <b>1,2-propanediol</b>    | 75.8               | 64.8   | 38.4   | 14.3   |
| <b>1,3-propanediol</b>    | 0.1                | 0.8    | 2.4    | 2.9    |
| <b>others<sup>a</sup></b> | 1.2                | 4.5    | 9.2    | 10.3   |

<sup>a</sup> Others = methane, ethane, propane, CO, CO<sub>2</sub>, acetol, condensation products
